# Supplementary material
Source: ML conference proceedings conference paper supplement (https://proceedings.mlr.press/v119/shen20a.html)
Supplement: Supplementary file [file shen20a-supp.pdf]

---

# Supplementary Material of PDO-eConvs: Partial Differential Operator Based Equivariant Convolutions

---

## 1. Numerical Schemes of Partial Differential Operators

### 1.1. Filters of Size $3 \times 3$

$$\tilde{u}_0 = \begin{bmatrix} 0 & 0 & 0 \\ 0 & 1 & 0 \\ 0 & 0 & 0 \end{bmatrix}$$

$$\tilde{u}_x = \frac{1}{h} \begin{bmatrix} 0 & 0 & 0 \\ -1/2 & 0 & 1/2 \\ 0 & 0 & 0 \end{bmatrix}$$

$$\tilde{u}_y = \frac{1}{h} \begin{bmatrix} 0 & 1/2 & 0 \\ 0 & 0 & 0 \\ 0 & -1/2 & 0 \end{bmatrix}$$

$$\tilde{u}_{xx} = \frac{1}{h^2} \begin{bmatrix} 0 & 0 & 0 \\ 1 & -2 & 1 \\ 0 & 0 & 0 \end{bmatrix}$$

$$\tilde{u}_{xy} = \frac{1}{h^2} \begin{bmatrix} -1/4 & 0 & 1/4 \\ 0 & 0 & 0 \\ 1/4 & 0 & -1/4 \end{bmatrix}$$

$$\tilde{u}_{yy} = \frac{1}{h^2} \begin{bmatrix} 0 & 1 & 0 \\ 0 & -2 & 0 \\ 0 & 1 & 0 \end{bmatrix}$$

$$\tilde{u}_{xxy} = \frac{1}{h^3} \begin{bmatrix} 1/2 & -1 & 1/2 \\ 0 & 0 & 0 \\ -1/2 & 1 & -1/2 \end{bmatrix}$$

$$\tilde{u}_{xyy} = \frac{1}{h^3} \begin{bmatrix} -1/2 & 0 & 1/2 \\ 1 & 0 & -1 \\ -1/2 & 0 & 1/2 \end{bmatrix}$$

$$\tilde{u}_{xxyy} = \frac{1}{h^4} \begin{bmatrix} 1 & -2 & 1 \\ -2 & 4 & -2 \\ 1 & -2 & 1 \end{bmatrix}$$

$$\tilde{u}_{yyy} = \frac{1}{h^3} \begin{bmatrix} 0 & 0 & 1/2 & 0 & 0 \\ 0 & 0 & -1 & 0 & 0 \\ 0 & 0 & 0 & 0 & 0 \\ 0 & 0 & 1 & 0 & 0 \\ 0 & 0 & -1/2 & 0 & 0 \end{bmatrix}$$

$$\tilde{u}_{xxx} = \frac{1}{h^4} \begin{bmatrix} 0 & 0 & 0 & 0 & 0 \\ 0 & 0 & 0 & 0 & 0 \\ 1 & -4 & 6 & -4 & 1 \\ 0 & 0 & 0 & 0 & 0 \\ 0 & 0 & 0 & 0 & 0 \end{bmatrix}$$

$$\tilde{u}_{xxyy} = \frac{1}{h^4} \begin{bmatrix} 0 & 0 & 0 & 0 & 0 \\ -1/4 & 1/2 & 0 & -1/2 & 1/4 \\ 0 & 0 & 0 & 0 & 0 \\ 1/4 & -1/2 & 0 & 1/2 & -1/4 \\ 0 & 0 & 0 & 0 & 0 \end{bmatrix}$$

$$\tilde{u}_{xyyy} = \frac{1}{h^4} \begin{bmatrix} 0 & -1/4 & 0 & 1/4 & 0 \\ 0 & 1/2 & 0 & -1/2 & 0 \\ 0 & 0 & 0 & 0 & 0 \\ 0 & -1/2 & 0 & 1/2 & 0 \\ 0 & 1/4 & 0 & -1/4 & 0 \end{bmatrix}$$

$$\tilde{u}_{yyyy} = \frac{1}{h^4} \begin{bmatrix} 0 & 0 & 1 & 0 & 0 \\ 0 & 0 & -4 & 0 & 0 \\ 0 & 0 & 6 & 0 & 0 \\ 0 & 0 & -4 & 0 & 0 \\ 0 & 0 & 1 & 0 & 0 \end{bmatrix}$$

### 1.2. Filters of Size $5 \times 5$

$$\tilde{u}_{xxx} = \frac{1}{h^3} \begin{bmatrix} 0 & 0 & 0 & 0 & 0 \\ 0 & 0 & 0 & 0 & 0 \\ -1/2 & 1 & 0 & -1 & 1/2 \\ 0 & 0 & 0 & 0 & 0 \\ 0 & 0 & 0 & 0 & 0 \end{bmatrix}$$
